# Supplementary material for: UDP-Glucose Dehydrogenases: Identification, Expression, and Function Analyses in Upland Cotton (Gossypium hirsutum)
Source: Front Genet. 2021 Jan 11;11:597890. doi: 10.3389/fgene.2020.597890 (PMC7831515; doi:10.3389/fgene.2020.597890)
Supplement: Supplementary Table 1 — Chromosomal locus ID and length of UGD proteins in four cotton species. [file Table_1.XLSX]

## Sheet: Sheet1
Table S1:Chromosomal locus ID and length of UGD proteins in four cotton species
species	Gene model	Chromosome	Start	End	CDS length (bp)	protein length (aa)	PI	Mw(kD)	Arabidopsis ortholog	Arabidopsis locus description
G. arboreum	Ga03G1431	Chr03	91597768	91599210	2409	802	5.83	52.9099	AT5G15490	| UDP-glucose 6-dehydrogenase family protein | chr5:5,027,872-5,029,314
	Ga07G0806	Chr07	9641832	9643274	1446	481	7.03	52.9219	AT5G15490	| UDP-glucose 6-dehydrogenase family protein | chr5:5,027,872-5,029,314
	Ga11G3316	Chr11	117650937	117652376	1446	481	5.84	53.0419	AT3G29360	| UDP-glucose 6-dehydrogenase family protein | chr3:11,267,375-11,268,817
	Ga12G2241	Chr12	75679090	75680532	1443	480	6.99	53.1092	AT3G29360	| UDP-glucose 6-dehydrogenase family protein | chr3:11,267,375-11,268,817
	Ga12G1218	Chr12	15138785	15140227	1446	481	6.22	52.8208	AT5G15490	| UDP-glucose 6-dehydrogenase family protein | chr5:5,027,872-5,029,314
	Ga13G0969	Chr13	27656192	27658131	2544	847	7.05	55.1335	AT5G15490	| UDP-glucose 6-dehydrogenase family protein | chr5:5,027,872-5,029,314
G. hirsutum	GH_D07G0764	D07	8163388	8164830	1443	480	7.391	52.938	AT5G15490	|UDP-glucose 6-dehydrogenase 5 | D07 : 8,163,388-8,164,830
	GH_D02G1409	D02	44737014	44738456	1443	480	6.191	52.818	AT5G15490	|UDP-glucose 6-dehydrogenase 1 | A13 : 31,464,854-31,466,793
	GH_A13G0896	A13	31464854	31466793	1542	513	7.65	56.499	AT3G29360	|UDP-glucose 6-dehydrogenase 1 | A13 : 31,464,854-31,466,793
	GH_A12G1812	A12	93509854	93511296	1443	480	6.619	52.821	AT5G15490	|UDP-glucose 6-dehydrogenase 1 | A12 : 93,509,854-93,511,296
	GH_A12G0815	A12	31753127	31754569	1443	480	7.336	53.109	AT3G29360	|UDP-glucose 6-dehydrogenase 2 | A12 : 31,753,127-31,754,569
	GH_A11G0743	A11	6593771	6595210	1440	479	6.033	53.042	AT3G29360	|UDP-glucose 6-dehydrogenase 1 | A11 : 6,593,771-6,595,210
	GH_A09G1740	A09	74322080	74323396	777	258	4.997	29.441	AT5G02510	|UDP-glucose 6-dehydrogenase | A09 : 74,322,080-74,323,396
	GH_A07G0770	A07	9189539	9190981	1443	480	7.896	52.907	AT5G15490	|UDP-glucose 6-dehydrogenase 5 | A07 : 9,189,539-9,190,981
	GH_A03G1219	A03	66842944	66844386	1443	480	6.272	52.798	AT5G15490	|UDP-glucose 6-dehydrogenase 5 | A03 : 66,842,944-66,844,386
	GH_D09G1686	D09	43945133	43946548	777	258	5.273	29.438	AT5G02510	|UDP-glucose 6-dehydrogenase | D09 : 43,945,133-43,946,548
	GH_D11G0775	D11	6254501	6255940	1440	479	6.034	53.125	AT3G29360	|UDP-glucose 6-dehydrogenase 1 | D11 : 6,254,501-6,255,940
	GH_D12G0766	D12	15773709	15775151	1443	480	6.516	53.066	AT3G29360	|UDP-glucose 6-dehydrogenase 2 | D12 : 15,773,709-15,775,151
	GH_D12G1806	D12	49288848	49290290	1443	480	6.619	52.789	AT5G15490	|UDP-glucose 6-dehydrogenase 1 | D12 : 49,288,848-49,290,290
	GH_D12G2520	D12	57649025	57655534	1446	481	7.619	53.461	AT3G29360	|UDP-glucose 6-dehydrogenase 2 | D12 : 57,649,025-57,655,534
	GH_D13G0834	D13	15214923	15216365	1443	480	7.371	52.645	AT5G15490	|UDP-glucose 6-dehydrogenase 5 | D13 : 15,214,923-15,216,365
G. raimondii	Gorai.001G077900.1	chr01	8065478	8067450	1440	479	7.03	52.9099	AT5G15490	| UDP-glucose 6-dehydrogenase family protein | chr5:5027872-5029314
	Gorai.005G144700.1	chr05	39204541	39207343	1443	480	6.06	52.8318	AT3G29360	| UDP-glucose 6-dehydrogenase family protein | chr3:11267375-11268817
	Gorai.007G081800.1	chr07	5834570	5837554	1443	480	5.84	53.0419	AT3G29360	| UDP-glucose 6-dehydrogenase family protein | chr3:11267375-11268817
	Gorai.008G095900.1	chr08	26157142	26159833	1443	480	6.62	53.1102	AT5G15490	| UDP-glucose 6-dehydrogenase family protein | chr5:5027872-5029314
	Gorai.008G177900.1	chr08	45460969	45463472	1443	480	6.42	52.7878	AT5G15490	| UDP-glucose 6-dehydrogenase family protein | chr5:5027872-5029314
	Gorai.013G092600.1	chr13	14940631	14942916	1545	514	7.89	56.461	AT5G15490	| UDP-glucose 6-dehydrogenase family protein | chr5:5027872-5029314
G.barbadense	GB_A03G1263	A03	63877254	63878696	1443	480	6.514	52.865	AT5G15490	|UDP-glucose 6-dehydrogenase 5 | A03 : 63,877,254-63,878,696
	GB_A07G0752	A07	9333482	9334744	1263	420	7.497	46.596	AT3G29360	|UDP-glucose 6-dehydrogenase 5 | A07 : 9,333,482-9,334,744
	GB_A09G1861	A09	70363840	70365154	777	258	5.111	29.414	AT5G02510	|UDP-glucose 6-dehydrogenase | A09 : 70,363,840-70,365,154
	GB_A11G0761	A11	6723612	6725051	1440	479	6.033	53.07	AT3G29360	|UDP-glucose 6-dehydrogenase 2 | A11 : 6,723,612-6,725,051
	GB_A12G0888	A11	29954570	29956012	1443	480	7.035	53.081	AT3G29360	|UDP-glucose 6-dehydrogenase 2 | A12 : 29,954,570-29,956,012
	GB_A12G1894	A12	87190120	87191562	1443	480	6.619	52.821	AT5G15490	|UDP-glucose 6-dehydrogenase 1 |A12 : 87,190,120-87,191,562
	GB_A13G0957	A13	32203067	32205006	1542	513	7.401	56.471	AT3G29360	|UDP-glucose 6-dehydrogenase 1 | A13 : 32,203,067-32,205,006
	GB_D02G1450	D02	43720799	43722241	1443	480	6.619	52.844	AT5G15490	|UDP-glucose 6-dehydrogenase 5 | D02 : 43,720,799-43,722,241
	GB_D07G0757	D07	8343670	8345112	1443	480	7.391	52.938	AT5G15490	|UDP-glucose 6-dehydrogenase 5 | D07 : 8,343,670-8,345,112
	GB_D09G1699	D09	45510269	45511686	777	258	5.273	29.465	AT5G02510	|UDP-glucose 6-dehydrogenase | D09 : 45,510,269-45,511,686
	GB_D11G0782	D11	6245224	6246663	1440	479	6.033	53.072	AT3G29360	|UDP-glucose 6-dehydrogenase 1 | D11 : 6,245,224-6,246,663
	GB_D12G1011	D12	15496952	15498394	1443	480	6.766	53.08	AT3G29360	|UDP-glucose 6-dehydrogenase 2 | D12 : 15,496,952-15,498,394
	GB_D12G1878	D12	48315465	48316907	1443	480	6.619	52.789	AT5G15490	|UDP-glucose 6-dehydrogenase 1 | D12 : 48,315,465-48,316,907
	GB_D12G2605	D12	56803241	56804683	1443	480	7.034	53.19	AT3G29360	|UDP-glucose 6-dehydrogenase 2| D12 : 56,803,241-56,804,683
	GB_D13G0869	D13	14739884	14741824	1542	513	7.862	56.479	AT5G15490	|UDP-glucose 6-dehydrogenase 5 | D13 : 14,739,884-14,741,824
